# Supplementary material for: Integrated analysis of two-lncRNA signature as a potential prognostic biomarker in cervical cancer: a study based on public database
Source: PeerJ. 2019 Apr 22;7:e6761. doi: 10.7717/peerj.6761 (PMC6482937; doi:10.7717/peerj.6761)
Supplement: Supplemental Information 6 — Gene name and Pearson |R| [file peerj-07-6761-s006.xlsx]

## Sheet: Sheet1
lncRNA	mRNA	Pearson
ILF3-AS1	RAMP2	0.559741
ILF3-AS1	C7orf55	0.546897
ILF3-AS1	C11orf68	0.523606
RASA4CP	CIRBP	0.514938
ILF3-AS1	PFDN5	0.494892
ILF3-AS1	SELM	0.490643
ILF3-AS1	TCEAL6	0.489195
ILF3-AS1	XAB2	0.486905
RASA4CP	CLEC3B	0.48318
ILF3-AS1	USE1	0.481796
ILF3-AS1	ROM1	0.481125
RASA4CP	ROM1	0.481125
ILF3-AS1	KAT8	0.474143
ILF3-AS1	NMRAL1	0.467307
ILF3-AS1	HSCB	0.464427
ILF3-AS1	ECSIT	0.462566
ILF3-AS1	WDR83OS	0.458188
ILF3-AS1	TACR1	0.457943
ILF3-AS1	FDX1L	0.457022
ILF3-AS1	CORT	0.455897
ILF3-AS1	PQBP1	0.451463
ILF3-AS1	LEFTY2	0.451033
ILF3-AS1	TCEAL7	0.450798
ILF3-AS1	RSPO1	0.447186
ILF3-AS1	EIF3G	0.446512
ILF3-AS1	NSMCE1	0.444545
ILF3-AS1	NDUFB7	0.441609
ILF3-AS1	OXLD1	0.441556
ILF3-AS1	GNG11	0.441208
ILF3-AS1	HFM1	0.440237
ILF3-AS1	UBXN1	0.437054
ILF3-AS1	THYN1	0.436764
ILF3-AS1	ABCG2	0.430463
ILF3-AS1	FIS1	0.429794
ILF3-AS1	COX14	0.429489
ILF3-AS1	HIST1H4J	0.426664
ILF3-AS1	PIN1	0.426109
ILF3-AS1	TRAPPC6A	0.426012
ILF3-AS1	VAMP2	0.425627
ILF3-AS1	LYRM4	0.425326
ILF3-AS1	NDUFA13	0.425116
ILF3-AS1	CD34	0.424106
ILF3-AS1	HTR2B	0.422391
ILF3-AS1	NCAM1	0.422284
ILF3-AS1	COA5	0.421296
ILF3-AS1	MPL	0.420785
ILF3-AS1	CCDC94	0.42078
ILF3-AS1	TRAPPC5	0.419668
ILF3-AS1	RAB11B	0.419345
ILF3-AS1	CCS	0.418684
ILF3-AS1	WDR83	0.416098
ILF3-AS1	BABAM1	0.415302
ILF3-AS1	SAG	0.414469
ILF3-AS1	NDP	0.414307
ILF3-AS1	GABARAP	0.41349
ILF3-AS1	GSTM5	0.412119
ILF3-AS1	LSM7	0.411566
ILF3-AS1	FKBP8	0.410196
ILF3-AS1	FGF7	0.409975
ILF3-AS1	CA4	0.409834
ILF3-AS1	NDUFA11	0.409746
ILF3-AS1	CCT6B	0.409467
ILF3-AS1	SOD3	0.40941
ILF3-AS1	NDN	0.408783
ILF3-AS1	GPX4	0.408194
ILF3-AS1	SLC2A4	0.408153
ILF3-AS1	CD2BP2	0.407432
ILF3-AS1	NRF1	0.407361
ILF3-AS1	NDUFB10	0.405815
ILF3-AS1	STX5	0.405747
ILF3-AS1	UQCC3	0.405703
ILF3-AS1	CCL16	0.401621
RASA4CP	CCL16	0.401621
ILF3-AS1	UBA52	0.400511
